# Supplementary material for: Immobilization of Brønsted basic hexaniobate on the Lewis acidic zirconia using an emulsion assisted self-assembly strategy for synergistic boosting of nerve agent simulant decontamination
Source: Royal Society of Chemistry journal article supplement (doi:10.1039/d2qi02484e), 2023-01-01
Supplement: d2qi02484e1.pdf [file d2qi02484e1.pdf]

## Supporting Information

# Immobilization of Brønsted Basic Hexaniobate on the Lewis Acidic Zirconia by an Emulsion Assisted Self-assembly Strategy for Synergistic Boosting Nerve Agent Simulant Decontamination

Huifang Liu,<sup>a</sup> Xiangrong Sun,<sup>c</sup> Jing Dong,<sup>b\*</sup> Chengpeng Liu,<sup>a</sup> Wei Lu,<sup>a</sup> Zhemi Xu,<sup>b</sup> Ni Zhen,<sup>a</sup> Di Zhang,<sup>a</sup> Yingnan Chi,<sup>a\*</sup> Changwen Hu<sup>a</sup>

<sup>a</sup>Key Laboratory of Cluster Science Ministry of Education, Beijing Key Laboratory of Photoelectroic/Electrophotonic Conversion Materials, School of Chemistry and Chemical Engineering, Beijing Institute of Technology, Beijing, 100081, People's Republic of China.

<sup>b</sup>College of Chemistry and Materials Engineering, Beijing Technology and Business University, 11 Fucheng Road, Beijing, 100048, People's Republic of China.

<sup>c</sup>Jiaxiang Country Branch of Jining Municipal Ecology and Environment Bureau, Jining, 272400, People's Republic of China.

## Table of Contents

### 1. Experimental section

1.1 Preparation of amphiphilic  $[C_{16}H_{33}N(CH_3)_3]_4K_3HNb_6O_{19}$

1.2 Preparation of  $ZrO_2$

### 2. Characterization of the as-prepared catalysts

Figure S1. The confocal microscopy images of the emulsion formed with  $C_{16}N-Nb_6$

Figure S2. The FT-IR spectra of the as-prepared catalyst

Figure S3. Thermogravimetric curves of  $C_{16}N-Nb_6/ZrO_2$  and  $C_{16}N-Nb_6$

Figure S4. The survey XPS spectrum of  $C_{16}N-Nb_6/ZrO_2$  composite

Figure S5. XRD patterns of  $C_{16}N-Nb_6/ZrO_2$ ,  $C_{16}N-Nb_6$  and  $ZrO_2$

Figure S6. Images of water contact angles of  $C_{16}N-Nb_6/ZrO_2$ ,  $C_{16}N-Nb_6$  and  $ZrO_2$

Table S1. The elemental analysis of the as-prepared catalysts

Table S2. The surface area and porosity data of  $C_{16}N-Nb_6/ZrO_2$  and  $ZrO_2$ .

### 3. Catalytic decontamination of DMNP and CEES

Figure S7.  $^{31}P$  NMR of DMNP hydrolysis over different catalysts

Figure S8.  $^{31}P$  NMR of DMNP hydrolysis over  $ZrO_2$  at pH = 9.3

Figure S9. FT-IR spectra of  $C_{16}N-Nb_6/ZrO_2$  before and after the catalytic hydrolysis reaction

Figure S10. Mass spectrum of CEESO

Figure S11. Mass spectrum of  $CEESO_2$

Figure S12. Raman spectra of  $ZrO_2$  before and after treating with aqueous  $H_2O_2$

Figure S13. FT-IR spectra of  $C_{16}N-Nb_6/ZrO_2$  before and after the oxidative decontamination reaction

Table S3. Comparison of the different catalysts for the hydrolytic activity.

### 4. References

## 1. Experimental Section

All the starting chemicals and solvents were reagent grade, purchased from commercial sources and used without further purification.  $\text{K}_7\text{HfNb}_6\text{O}_{19} \cdot 13\text{H}_2\text{O}$  was synthesized according to the reported method<sup>[1]</sup>.

### 1.1 Preparation of amphiphilic $[\text{C}_{16}\text{H}_{33}\text{N}(\text{CH}_3)_3]_4\text{K}_3\text{HfNb}_6\text{O}_{19}$

$[\text{C}_{16}\text{H}_{33}\text{N}(\text{CH}_3)_3]_4\text{K}_3\text{HfNb}_6\text{O}_{19}$  ( $\text{C}_{16}\text{N-Nb}_6$ ) was prepared according to the reported method<sup>[2]</sup>.  $[\text{C}_{16}\text{H}_{33}\text{N}(\text{CH}_3)_3]\text{Br}$  (1.0 g) was fully dissolved in deionized water (50 ml) under ultrasonic condition to obtain solution A.  $\text{K}_7\text{HfNb}_6\text{O}_{19} \cdot 8\text{H}_2\text{O}$  (0.05 mmol) was dissolved in 80 mL  $\text{NaH}_2\text{PO}_4$  -  $\text{Na}_2\text{HPO}_4$  buffer solution (0.2 M, pH = 8.2) to obtain solution B. The solution B was injected into solution A and stirred rapidly for 1 h at room temperature. And then, the obtained white precipitate was collected by centrifugation and washed with deionized water for 3 times. Finally, the white precipitate was dried under oven at 60°C overnight to obtain amphiphilic  $\text{C}_{16}\text{N-Nb}_6$ .

### 1.2 Preparation of zirconia

Zirconium *n*-butoxide (0.5 mL) was dropped into deionized water (10 mL, ice-bath) with continuous stirring. After 30 min, the  $\text{ZrO}_2$  product was obtained by filtration, washing and drying.

## 2. Characterization of the as-prepared catalysts

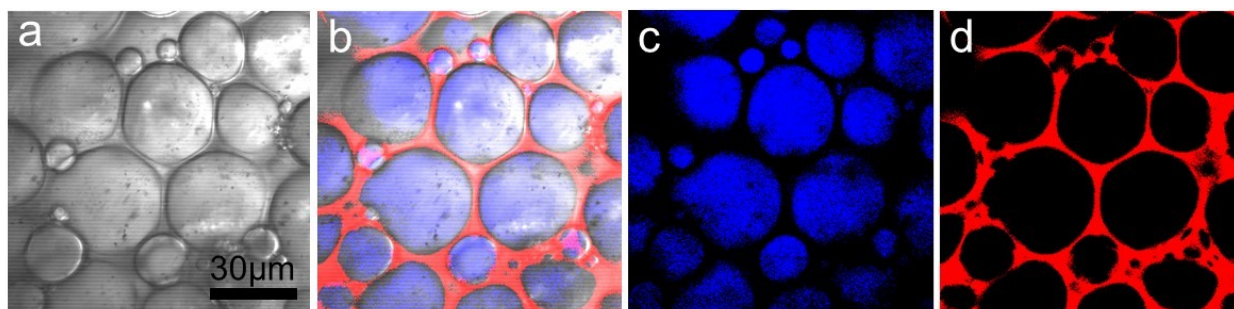

**Figure S1.** The confocal microscopy images of water-in-oil type emulsion formed with  $C_{16}N-Nb_6$  in the mixture solution of water and toluene, where the oil phase was stained with Nile Red (red) and the water phase was stained with polydopamine quantum dots (blue). (a) Without laser irradiation. (b) Both the polydopamine quantum dots in water phase and the Nile Red in oil phase were simultaneously irradiated. (c) Only the polydopamine quantum dots in water phase were irradiated; (d) Only with the Nile Red in oil phase was irradiated.

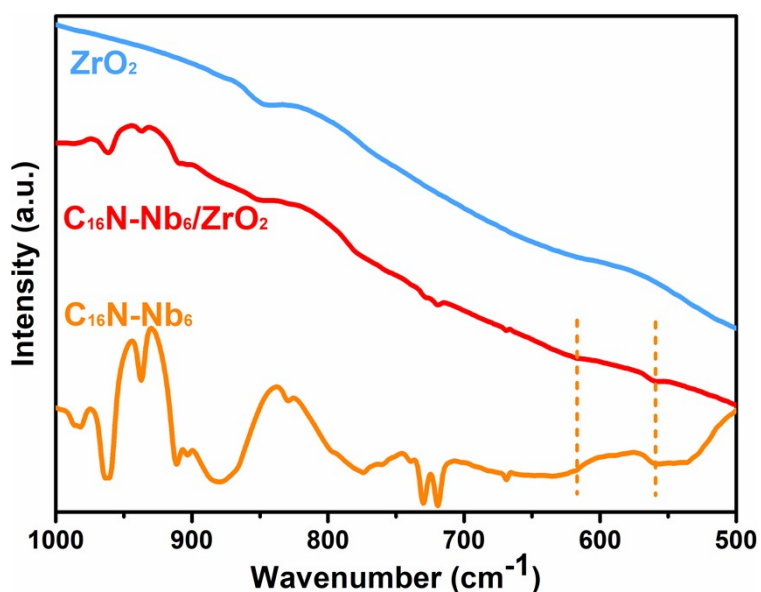

**Figure S2.** The FT-IR spectra of  $C_{16}N-Nb_6/ZrO_2$ ,  $C_{16}N-Nb_6$  and  $ZrO_2$  in the region of 500-1000  $cm^{-1}$ .

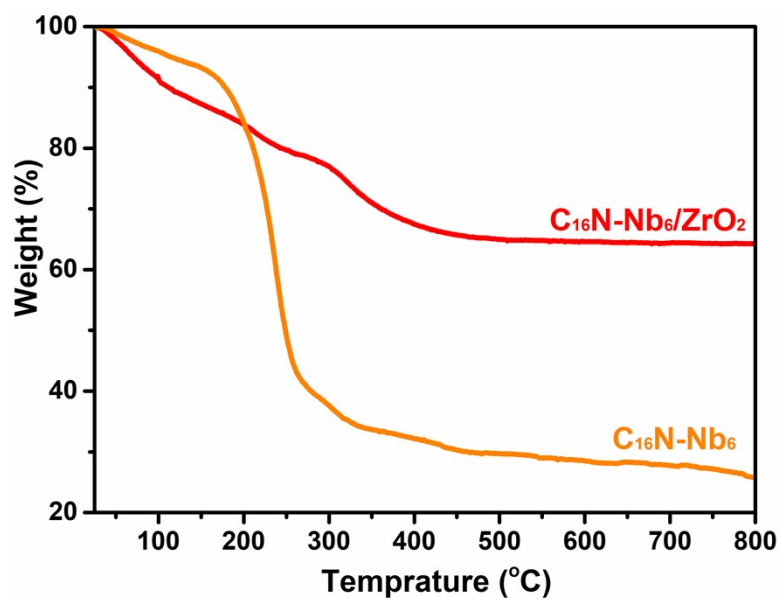

**Figure S3.** Thermogravimetric curves of 11%- $C_{16}N-Nb_6/ZrO_2$  and  $C_{16}N-Nb_6$ .

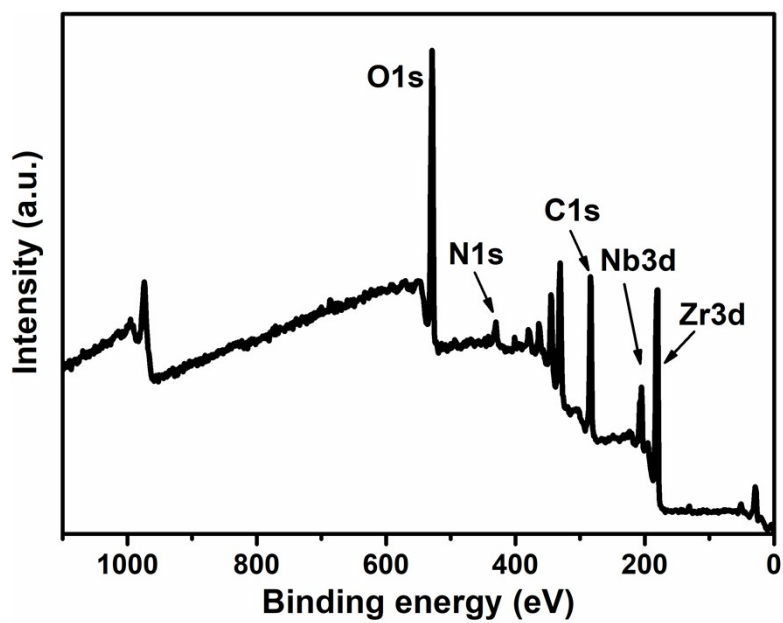

**Figure S4.** The survey XPS spectrum of the  $C_{16}N-Nb_6/ZrO_2$  composite.

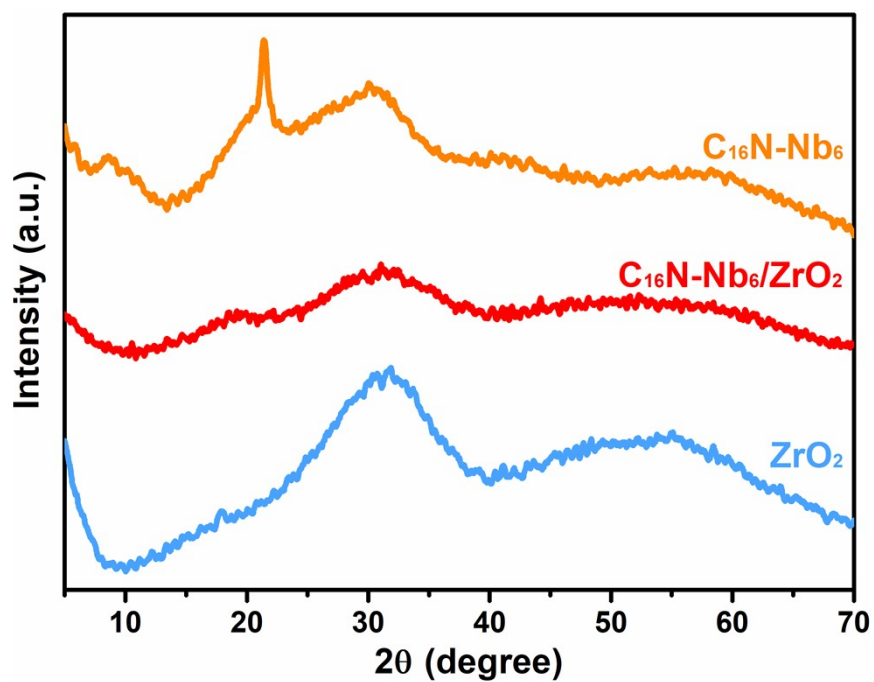

**Figure S5.** XRD patterns of  $C_{16}N-Nb_6/ZrO_2$ ,  $C_{16}N-Nb_6$  and  $ZrO_2$ .

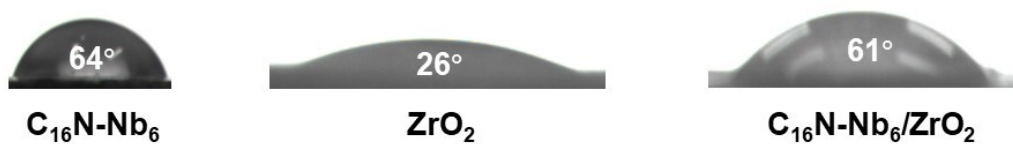

**Figure S6.** Images of water contact angles of  $C_{16}N-Nb_6$ ,  $ZrO_2$  and  $C_{16}N-Nb_6/ZrO_2$ .

### 3. Catalytic decontamination of DMNP and CEES

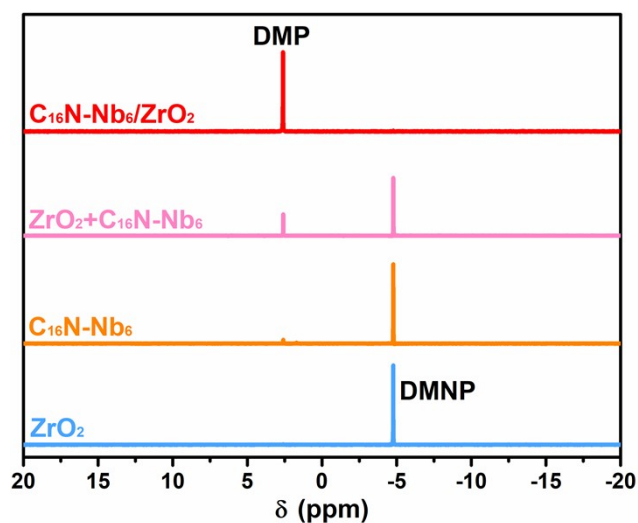

**Figure S7.**  $^{31}\text{P}$  NMR of DMNP hydrolysis over different catalysts after 6 h. Reaction conditions: DMNP (5 mg),  $\text{H}_2\text{O}$  (300  $\mu\text{L}$ ),  $\text{CD}_3\text{CN}$  (200  $\mu\text{L}$ ), catalyst (1.7 mg for  $\text{C}_{16}\text{N-Nb}_6$ , 13.3 mg for  $\text{ZrO}_2$ ), room temperature for 6 h.

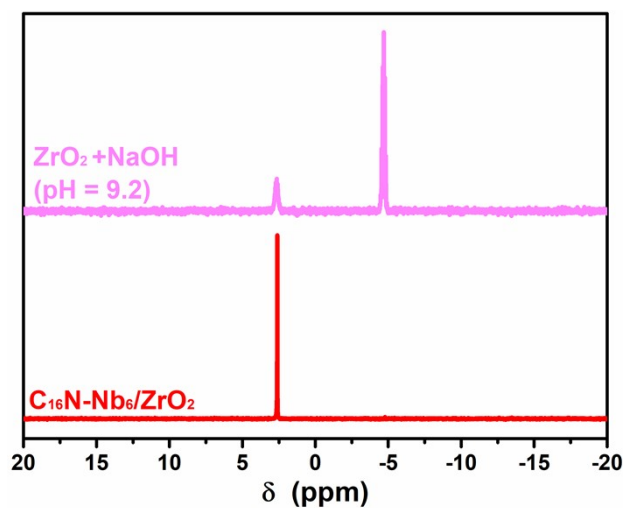

**Figure S8.**  $^{31}\text{P}$  NMR of DMNP hydrolysis over  $\text{ZrO}_2$  at pH = 9.3 after 6 h. Reaction conditions: DMNP (5 mg),  $\text{H}_2\text{O}$  (300  $\mu\text{L}$ ),  $\text{CD}_3\text{CN}$  (200  $\mu\text{L}$ ),  $\text{ZrO}_2$  (13.3 mg), room temperature for 6 h.

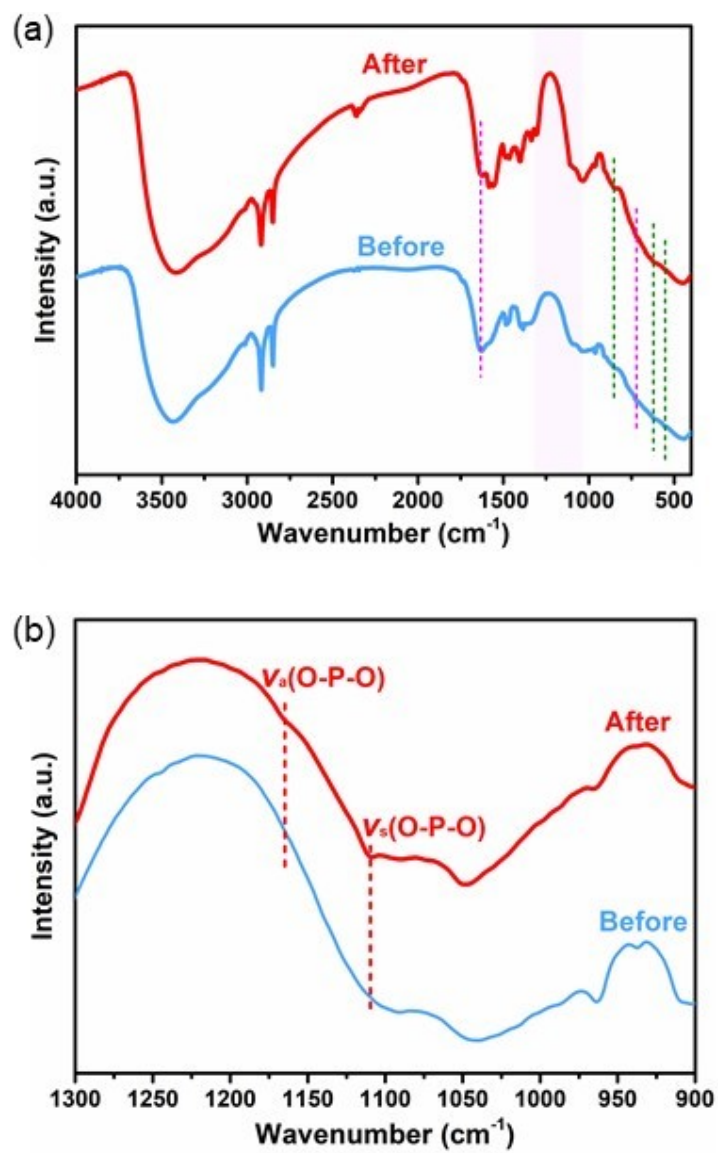

**Figure S9.** FT-IR spectra of  $\text{C}_{16}\text{N-Nb}_6/\text{ZrO}_2$  before and after the catalytic hydrolysis reaction.



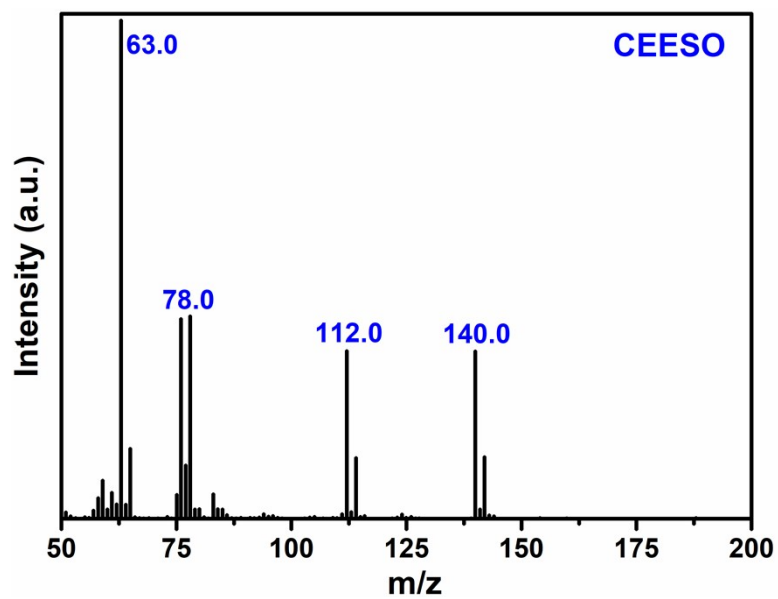

Figure S10. Mass spectrum of CEESO.

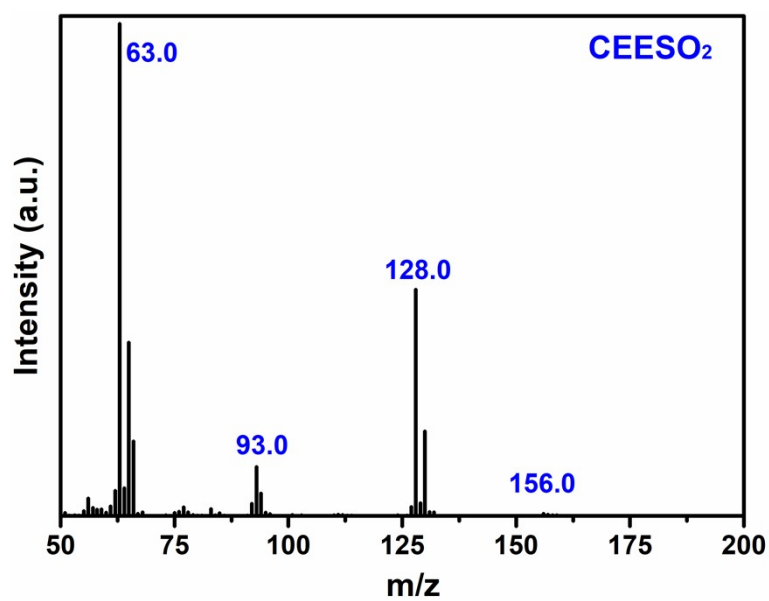

Figure S11. Mass spectrum of CEESO<sub>2</sub>.

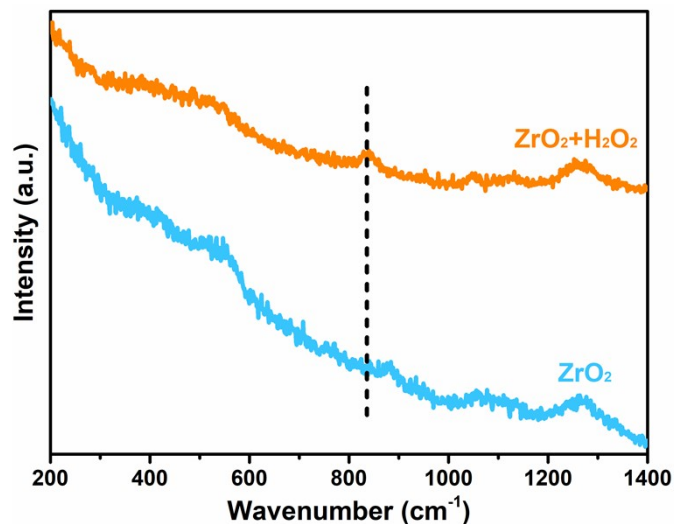

**Figure S12.** Raman spectra of ZrO<sub>2</sub> before (blue line) and after (orange line) treating with aqueous H<sub>2</sub>O<sub>2</sub>. A new peak at 838 cm<sup>-1</sup> was assigned to O-O stretching appeared after treating the ZrO<sub>2</sub> with H<sub>2</sub>O<sub>2</sub>, suggesting a Zr-peroxo species might be also responsible for the oxidative decontamination reaction.

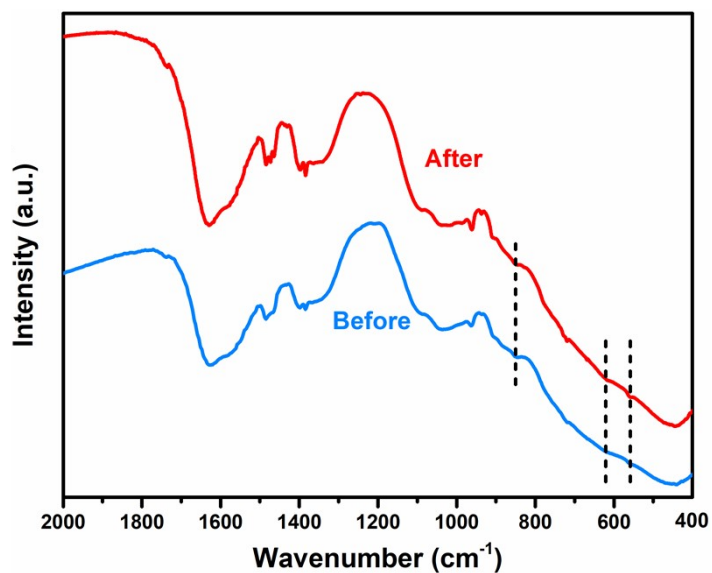

**Figure S13.** FT-IR spectra of C<sub>16</sub>N-Nb<sub>6</sub>/ZrO<sub>2</sub> before and after the oxidative decontamination reaction.

**Table S1.** The elemental analysis of the as-prepared C<sub>16</sub>N-Nb<sub>6</sub>/ZrO<sub>2</sub> catalysts.

| Composite                                                | Mass ratio of<br>C <sub>16</sub> N-Nb <sub>6</sub> and ZrO <sub>2</sub> | Calculated loading amount<br>of C <sub>16</sub> N-Nb <sub>6</sub> (wt%) |
|----------------------------------------------------------|-------------------------------------------------------------------------|-------------------------------------------------------------------------|
| C <sub>16</sub> N-Nb <sub>6</sub> /ZrO <sub>2</sub> -19% | 3:5                                                                     | 19.3                                                                    |
| C <sub>16</sub> N-Nb <sub>6</sub> /ZrO <sub>2</sub> -11% | 1:3                                                                     | 11.6                                                                    |
| C <sub>16</sub> N-Nb <sub>6</sub> /ZrO <sub>2</sub> -9%  | 1:4                                                                     | 9.1                                                                     |
| C <sub>16</sub> N-Nb <sub>6</sub> /ZrO <sub>2</sub> -6%  | 1:6                                                                     | 6.7                                                                     |
| C <sub>16</sub> N-Nb <sub>6</sub> /ZrO <sub>2</sub> -4%  | 1:8                                                                     | 4.5                                                                     |

**Table S2.** The surface area and porosity data of C<sub>16</sub>N-Nb<sub>6</sub>/ZrO<sub>2</sub> and ZrO<sub>2</sub>.

| Sample                                             | S <sub>BET</sub><br>(m <sup>2</sup> /g) | Pore volume<br>(cm <sup>3</sup> /g) | Average Pore Diameter<br>(nm) |
|----------------------------------------------------|-----------------------------------------|-------------------------------------|-------------------------------|
| C <sub>16</sub> -Nb <sub>6</sub> /ZrO <sub>2</sub> | 41.6                                    | 0.27                                | 25.9                          |
| ZrO <sub>2</sub>                                   | 242.8                                   | 0.39                                | 6.4                           |

**Table S3.** Comparison of the different catalysts for the hydrolytic decontamination of nerve agent simulants under basic additive free conditions.

| Entry | Catalyst                                             | Simulant            | Conv. (%) | Time   | System                     | Ref.      |
|-------|------------------------------------------------------|---------------------|-----------|--------|----------------------------|-----------|
| 1     | C <sub>16</sub> N-Nb <sub>6</sub> /ZrO <sub>2</sub>  | DMNP                | 100       | 6 h    | heterogeneous              | This work |
| 2     | MOF-808                                              | POX <sup>[f]</sup>  | 0         | 35 min | heterogeneous              | 3         |
| 3     | NU-1000                                              | POX                 | 0         | 35 min | heterogeneous              | 3         |
| 4     | UiO-66-NH <sub>2</sub>                               | POX                 | ~20       | 35 min | heterogeneous              | 3         |
| 5     | {[PW <sub>11</sub> Zr] <sub>2</sub> } <sup>[a]</sup> | DMNP                | 100       | 120 h  | homogeneous                | 4         |
| 6     | {Sc <sub>2</sub> PW <sub>10</sub> } <sup>[b]</sup>   | DMNP                | 97        | 9 h    | homogeneous                | 5         |
| 7     | {GeNb <sub>12</sub> } <sup>[c]</sup>                 | DMMP <sup>[g]</sup> | 54        | 264 h  | heterogeneous              | 6         |
| 8     | {Nb <sub>47</sub> } <sup>[d]</sup>                   | DMMP                | 46        | 263 h  | homogeneous                | 7         |
| 9     | {Nb <sub>54</sub> } <sup>[e]</sup>                   | DMMP                | 40        | 264 h  | heterogeneous              | 8         |
| 10    | Zr(OH) <sub>4</sub> -fiber                           | DFP <sup>[h]</sup>  | 62        | 24 h   | solid phase <sup>[i]</sup> | 9         |

[a] {[PW<sub>11</sub>Zr]<sub>2</sub>}: (Et<sub>2</sub>NH<sub>2</sub>)<sub>8</sub>{[α-PW<sub>11</sub>O<sub>39</sub>Zr(μ-OH)(H<sub>2</sub>O)]<sub>2</sub>}·7H<sub>2</sub>O.

[b] {Sc<sub>2</sub>PW<sub>10</sub>}: Na<sub>7</sub>[Sc<sub>2</sub>(CH<sub>3</sub>COO)<sub>2</sub>PW<sub>10</sub>O<sub>38</sub>]·10H<sub>2</sub>O·2CH<sub>3</sub>COONa.

[c] {GeNb<sub>12</sub>}: K<sub>12</sub>[T<sub>12</sub>O<sub>2</sub>][GeNb<sub>12</sub>O<sub>40</sub>]·19H<sub>2</sub>O.

[d] {Nb<sub>47</sub>}: H<sub>2</sub>Li<sub>5</sub>Na<sub>3</sub>K<sub>5</sub>[Cu(en)<sub>2</sub>]<sub>7</sub>[Nb<sub>47</sub>O<sub>128</sub>(OH)<sub>6</sub>(CO<sub>3</sub>)<sub>2</sub>]·20H<sub>2</sub>O, en = ethylenediamine.

[e] {Nb<sub>54</sub>}: H<sub>5</sub>Na<sub>7</sub>K<sub>4</sub>[Cu(en)<sub>2</sub>]<sub>2</sub>[Cu(en)(H<sub>2</sub>O)]<sub>2</sub>[Cu(en)<sub>2</sub>(H<sub>2</sub>O)]<sub>4</sub>[Nb<sub>54</sub>O<sub>151</sub>]·27H<sub>2</sub>O,

en = ethylenediamine.

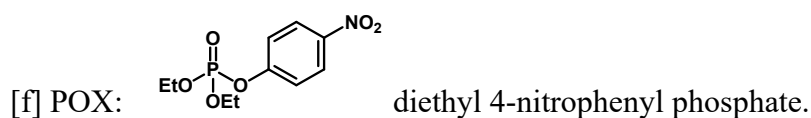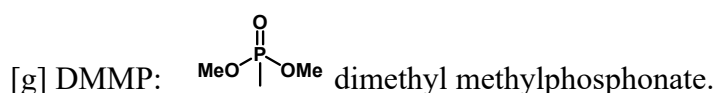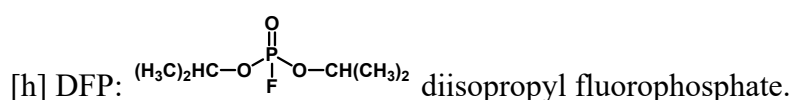

[i] Zr(OH)<sub>4</sub>-fiber is soaked by DFP at room temperature with a proper humidity level.

#### 4. References

- [1] C. M. Flynn Jr., G. D. Stucky, *Inorg. Chem.*, 1969, **8**, 332-334.
- [2] X. Q. Li, J. Dong, H. F. Liu, X. R. Sun, Y. N. Chi, C. W. Hu, *J. Hazard. Mater.*, 2018, **344**, 994-999.
- [3] M. C. Koning, M. v. Grol, T. Breijaert, *Inorg. Chem.*, 2017, **56**, 11804-11809.
- [4] D. L. Collins-Wildman, M. Kim, K. P. Sullivan, A. M. Plonka, A. I. Frenkel, D. G. Musaev, C. L. Hill, *ACS Catal.*, 2018, **8**, 7068-7076.
- [5] D. Zhang, W. Q. Zhang, Z. G. Lin, J. Dong, N. Zhen, Y. N. Chi, C. W. Hu, *Inorg. Chem.*, 2020, **59**, 9756-9764.
- [6] W. W. Guo, H. J. Lv, K. P. Sullivan, W. O. Gordon, A. Balboa, G. W. Wagner, D. G. Musaev, J. Bacsá, C. L. Hill, *Angew. Chem. Int. Ed.*, 2016, **55**, 7403-7407.
- [7] Y. L. Wu, X. X. Li, Y. J. Qi, H. Yu, L. Jin, S. T. Zheng, *Angew. Chem. Int. Ed.*, 2018, **57**, 8572-8576.
- [8] Y. L. Wu, Y. J. Wang, Y. Q. Sun, X. X. Li, S. T. Zheng, *Chem. Commun.*, 2011, **58**, 3322-3325.
- [9] S. Kim, W. B. Ying, H. Jung, S. G. Ryu, B. Lee, K. J. Lee, *Chem. Asian J.*, 2017, **12**, 698-705.
